# Supplementary material
Source: HighWire-hosted journal article supplement (http://www.cmaj.ca/highwire/filestream/78641/field_highwire_adjunct_files/0/201748-res-1-at.pdf)
Supplement: 201748-res-1-at.pdf [file 201748-res-1-at.pdf]

Seasonal variations of selected noninfluenza respiratory viruses (RSV, hRV, hCoV) and influenza virus (IV) infections

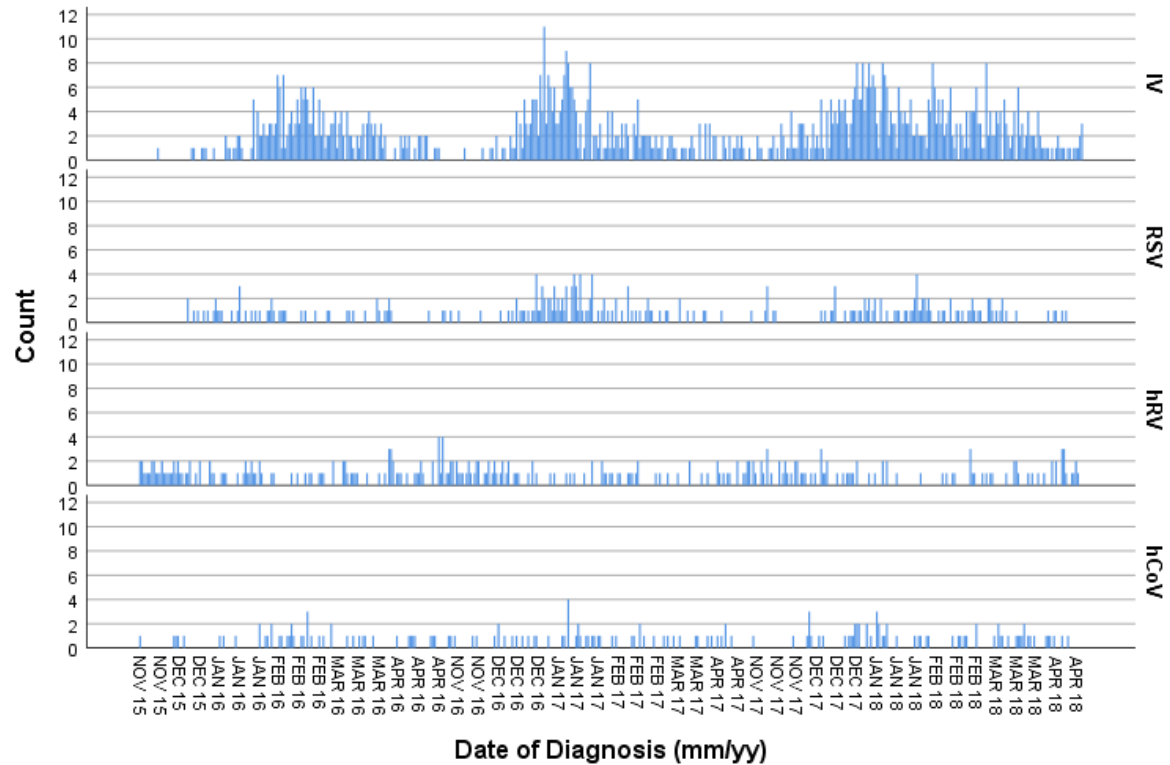

Population surveillance data, Canada:

2016/17: <https://www.canada.ca/en/public-health/services/surveillance/respiratory-virus-detections-canada/2016-2017/respiratory-virus-detections-isolations-week-33-ending-august-19-2017.html>

2017/18: <https://www.canada.ca/en/public-health/services/surveillance/respiratory-virus-detections-canada/2017-2018/respiratory-virus-detections-isolations-week-34-ending-august-25-2018.html>
